# Supplementary material
Source: Springer Nature journal article supplement (http://www.springermedizin.de/resource/supplementary/12894_2004_33_MOESM2_ESM.pdf/9513762)

Cumulative  
Probabilities

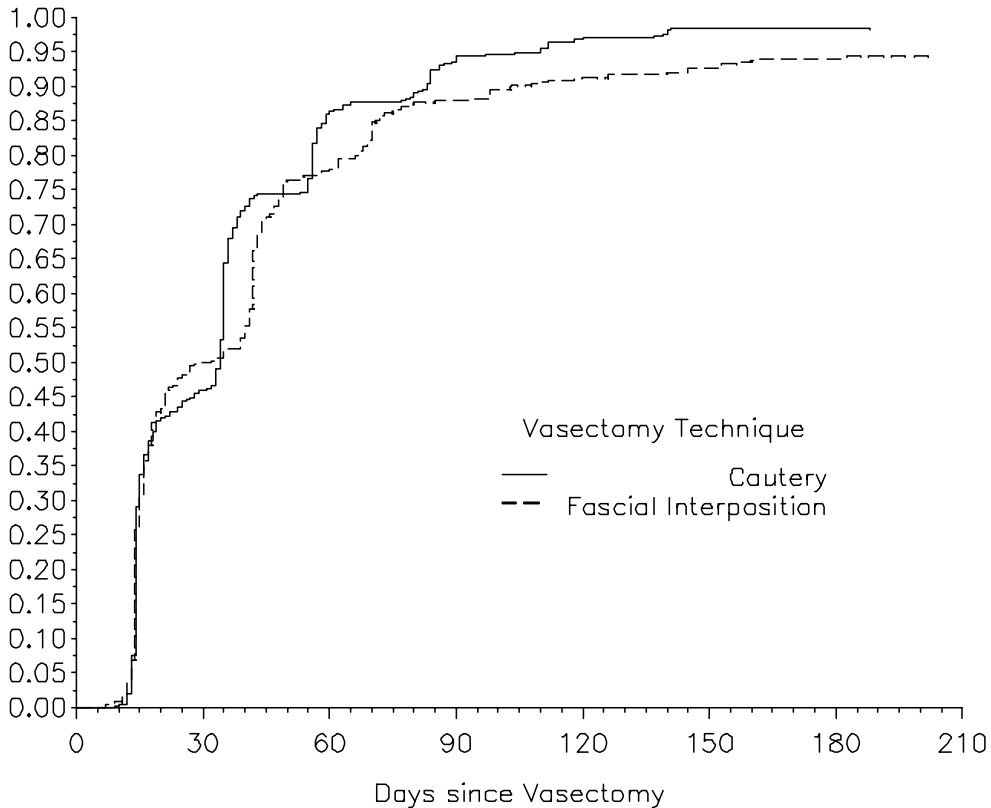

Supplement: MOESM2 [file 9513762]
